# Supplementary material
Source: Springer Nature journal article supplement (https://www.springermedizin.de/resource/supplementary/12889_2009_1851_MOESM1_ESM.pdf/9504182)

## Men

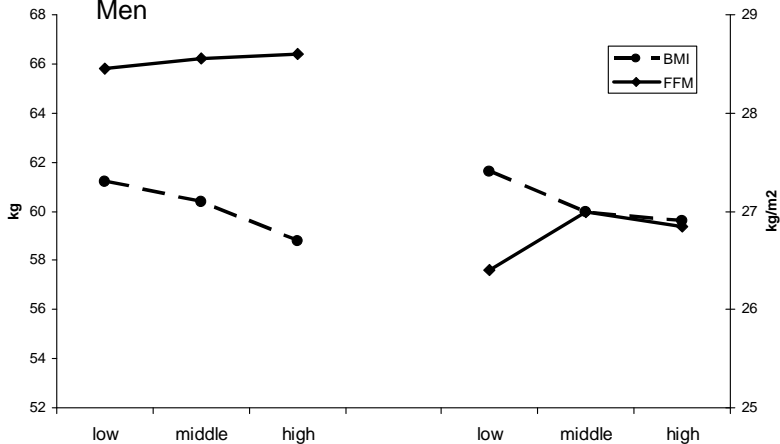

## Women

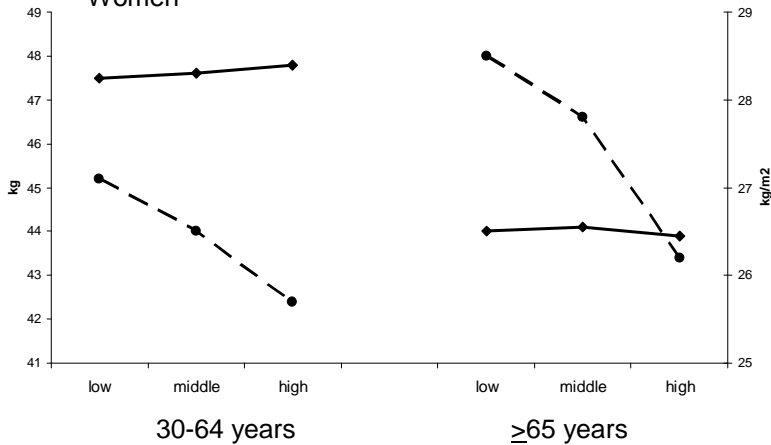

Supplement: MOESM1 [file 9504182]
